# Supplementary material
Source: PubMed Central journal article supplement (PMC4749154)
Supplement: NIHMS750350-supplement-Supporting-Information.pdf [file NIHMS750350-supplement-Supporting-Information.pdf]

## Supporting Information

# *Melampodium leucanthum*, a Source of Cytotoxic Sesquiterpenes with Antimitotic Activities

Andrew J. Robles,<sup>†</sup> Jiangnan Peng,<sup>\*,†,‡,⊥</sup> Rachel M. Hartley,<sup>†,⊥</sup> Brigitte Lee,<sup>†</sup> and Susan L. Mooberry<sup>\*,†,‡,§</sup>

<sup>†</sup>Department of Pharmacology, <sup>‡</sup>Cancer Therapy & Research Center, and <sup>§</sup>Department of  
Medicine, The University of Texas Health Science Center at San Antonio, San Antonio, Texas  
78229-3900, United States

## Table of Contents

|         |                                                                |         |
|---------|----------------------------------------------------------------|---------|
| Fig. S1 | Concentration-response curves for <b>(1)</b>                   | Page S3 |
| Fig. S2 | <sup>1</sup> H and COSY NMR spectra of meleucanthin <b>(1)</b> | Page S4 |
| Fig. S3 | HSQC and HMBC spectra of meleucanthin <b>(1)</b>               | Page S5 |

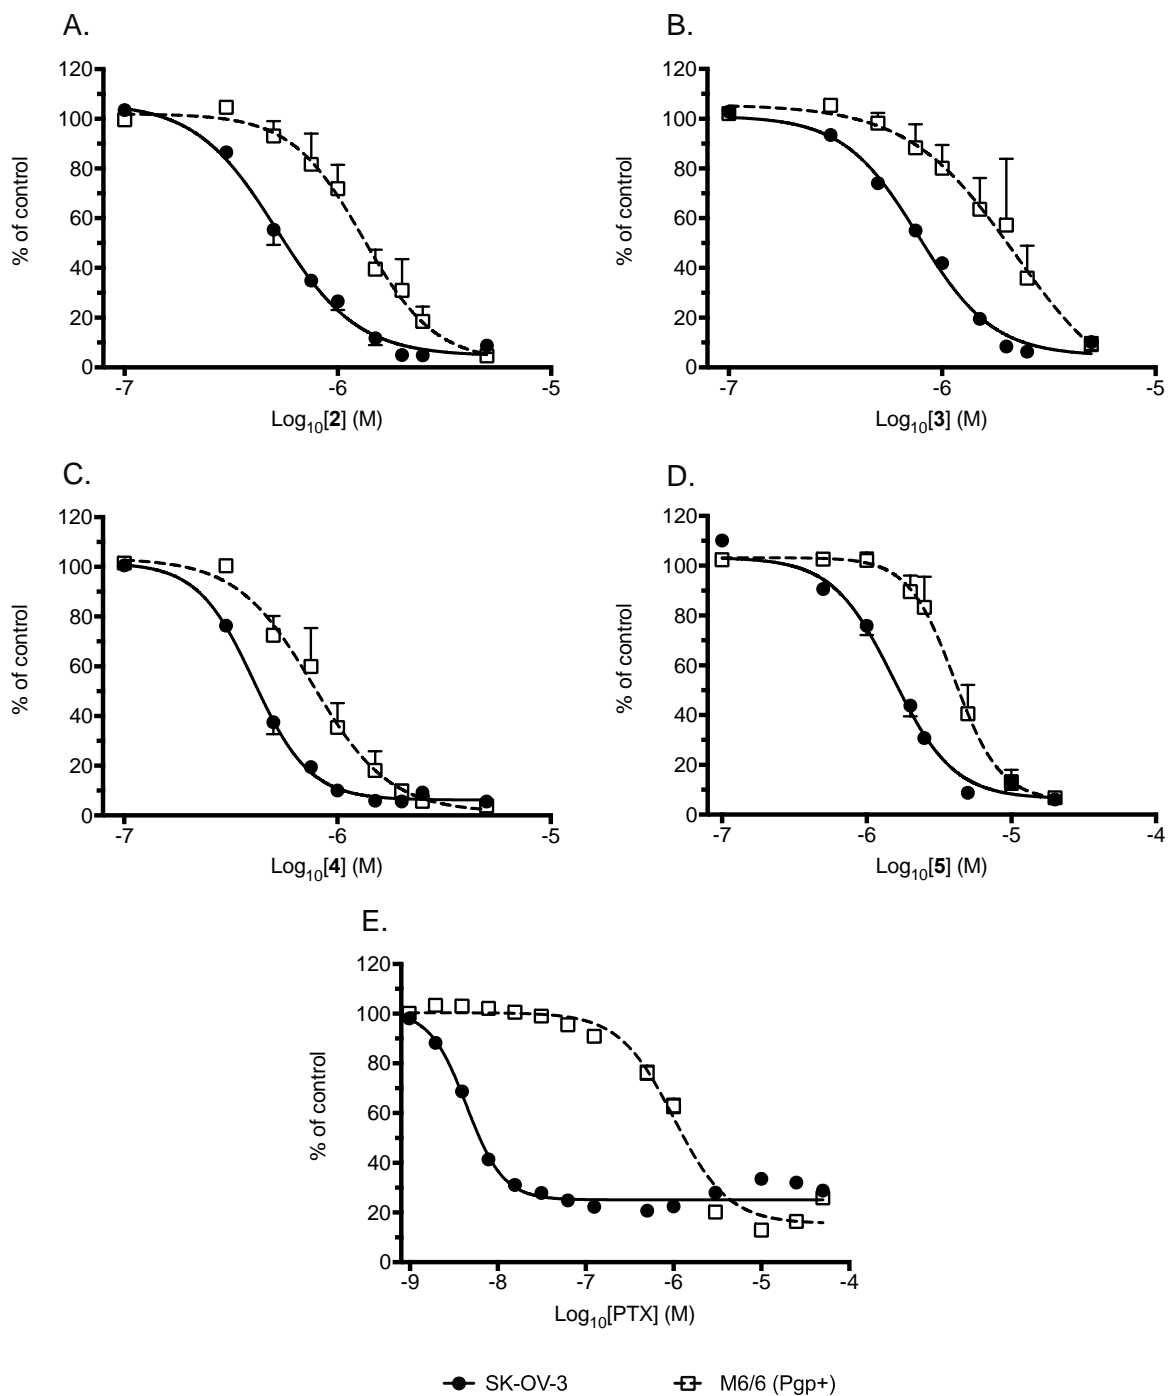

**Fig S1.** Concentration-response curves for growth inhibition of SK-OV-3 and SK-OV-3/MDR-1-M6/6 (M6/6) cells by compounds 2–5 or paclitaxel (PTX), measured with the SRB assay. Results represent n = 2–9 independent experiments, with each concentration tested in triplicate.

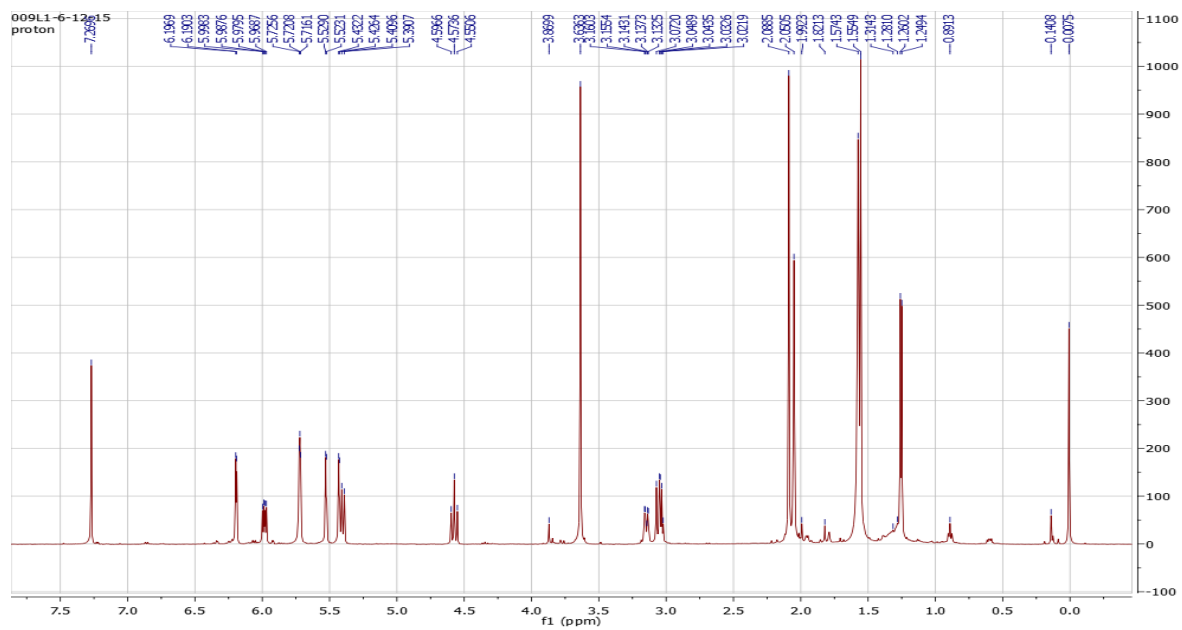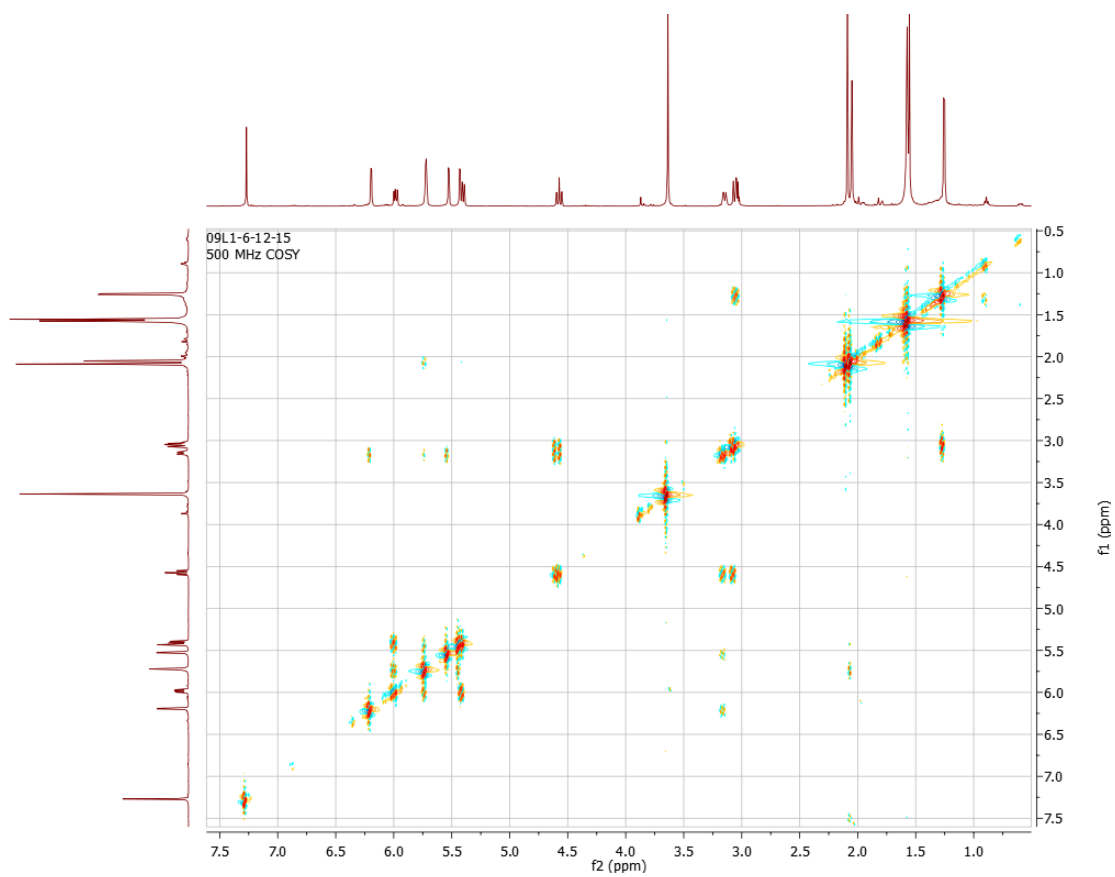

**Fig S2.**  $^1\text{H}$  NMR (Top) and COSY (Bottom) spectra for meleucanthin (**1**).

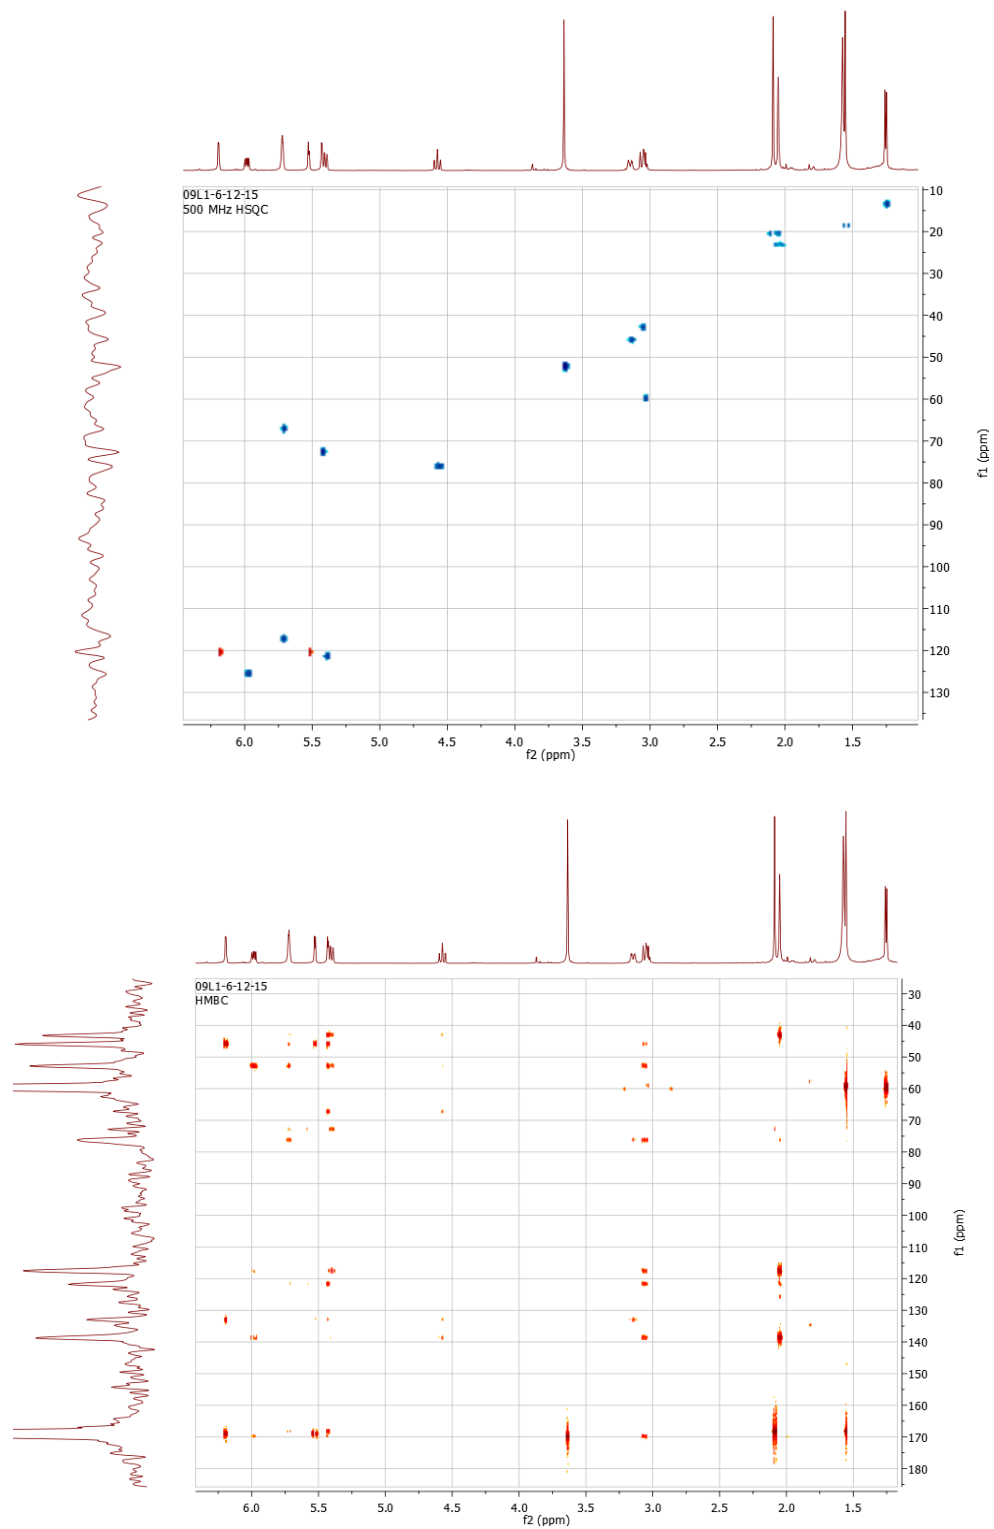

**Fig S2.** HSQC NMR (Top) and HMBC (Bottom) spectra for meleucanthin (**1**).
